# Supplementary material
Source: PubMed Central journal article supplement (PMC1182314)

**A**Prometaphase  
Spindle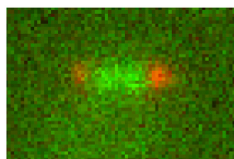**B**Metaphase  
Spindle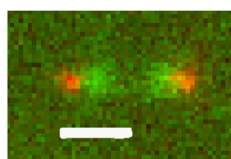**C**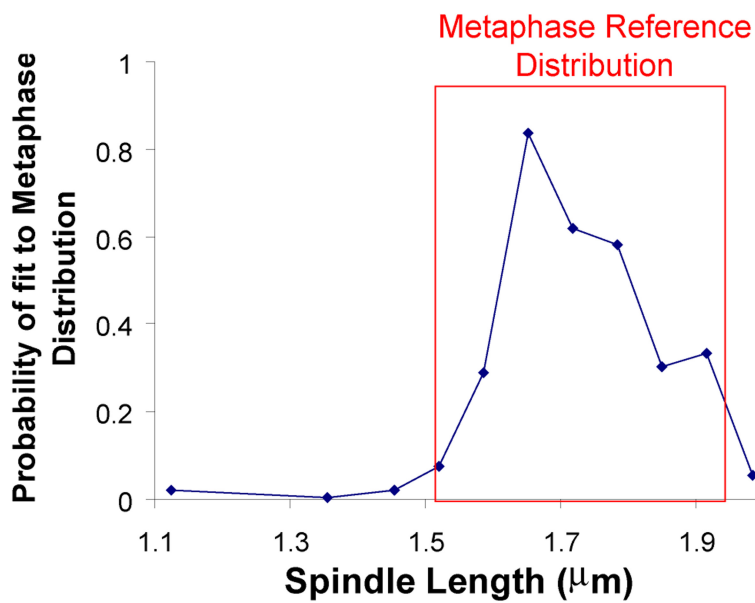**D**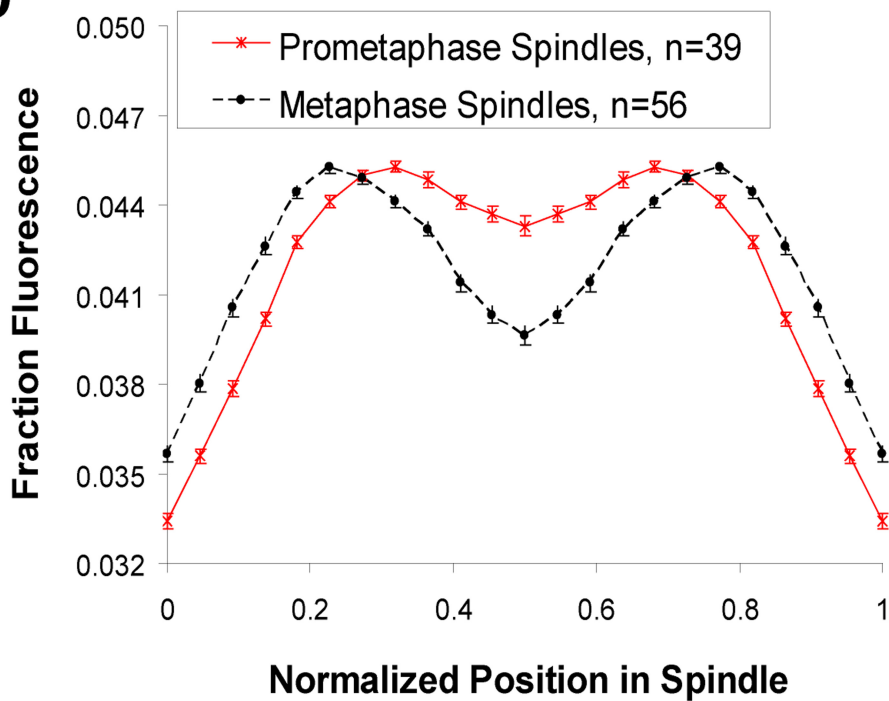

Supplement: mbc_E05-04-0275_1.pdf [file mbc_E05-04-0275_1.pdf]

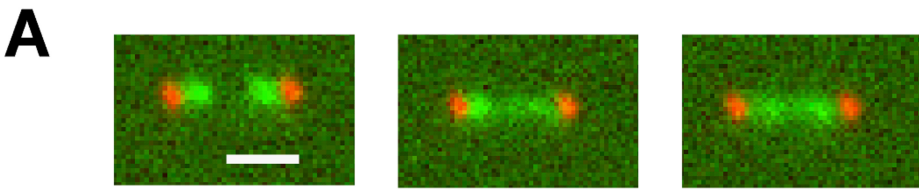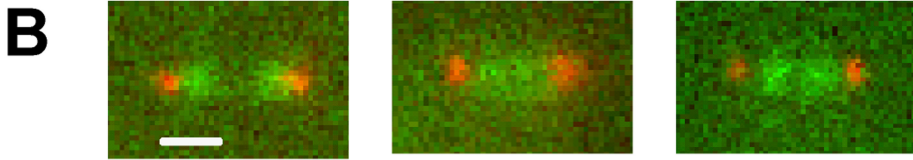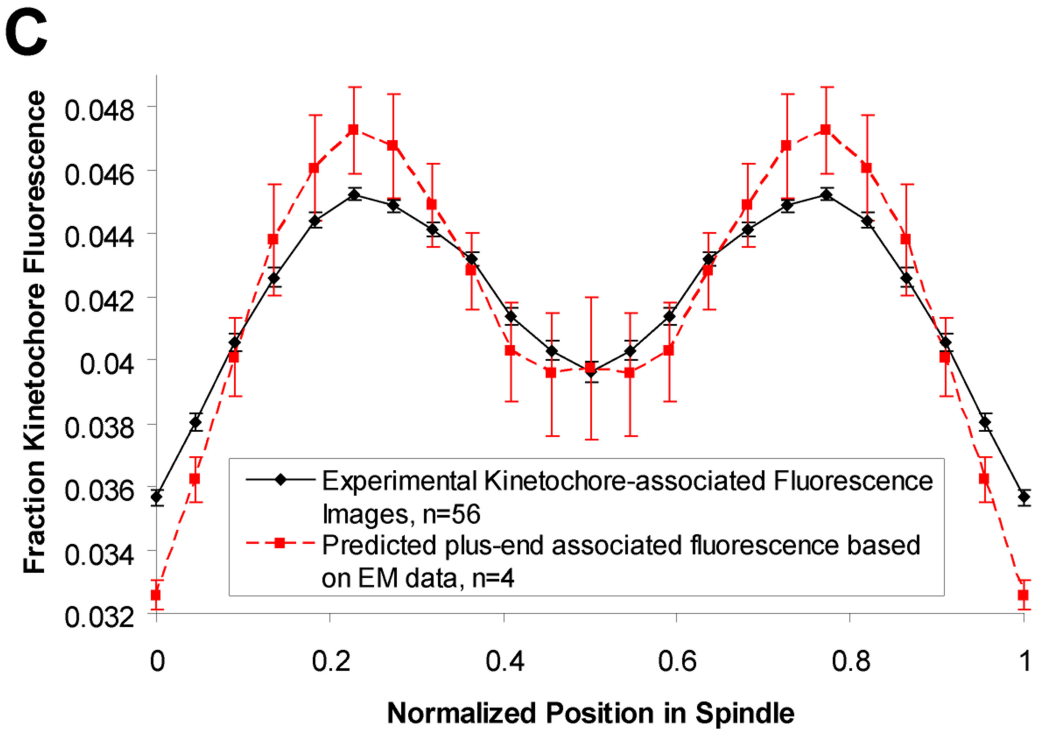

Supplement: mbc_E05-04-0275_2.pdf [file mbc_E05-04-0275_2.pdf]
